# Supplementary material
Source: PubMed Central journal article supplement (PMC8357161)
Supplement: NIHMS1719832-supplement-Supplementl_Figures.pdf [file NIHMS1719832-supplement-Supplementl_Figures.pdf]

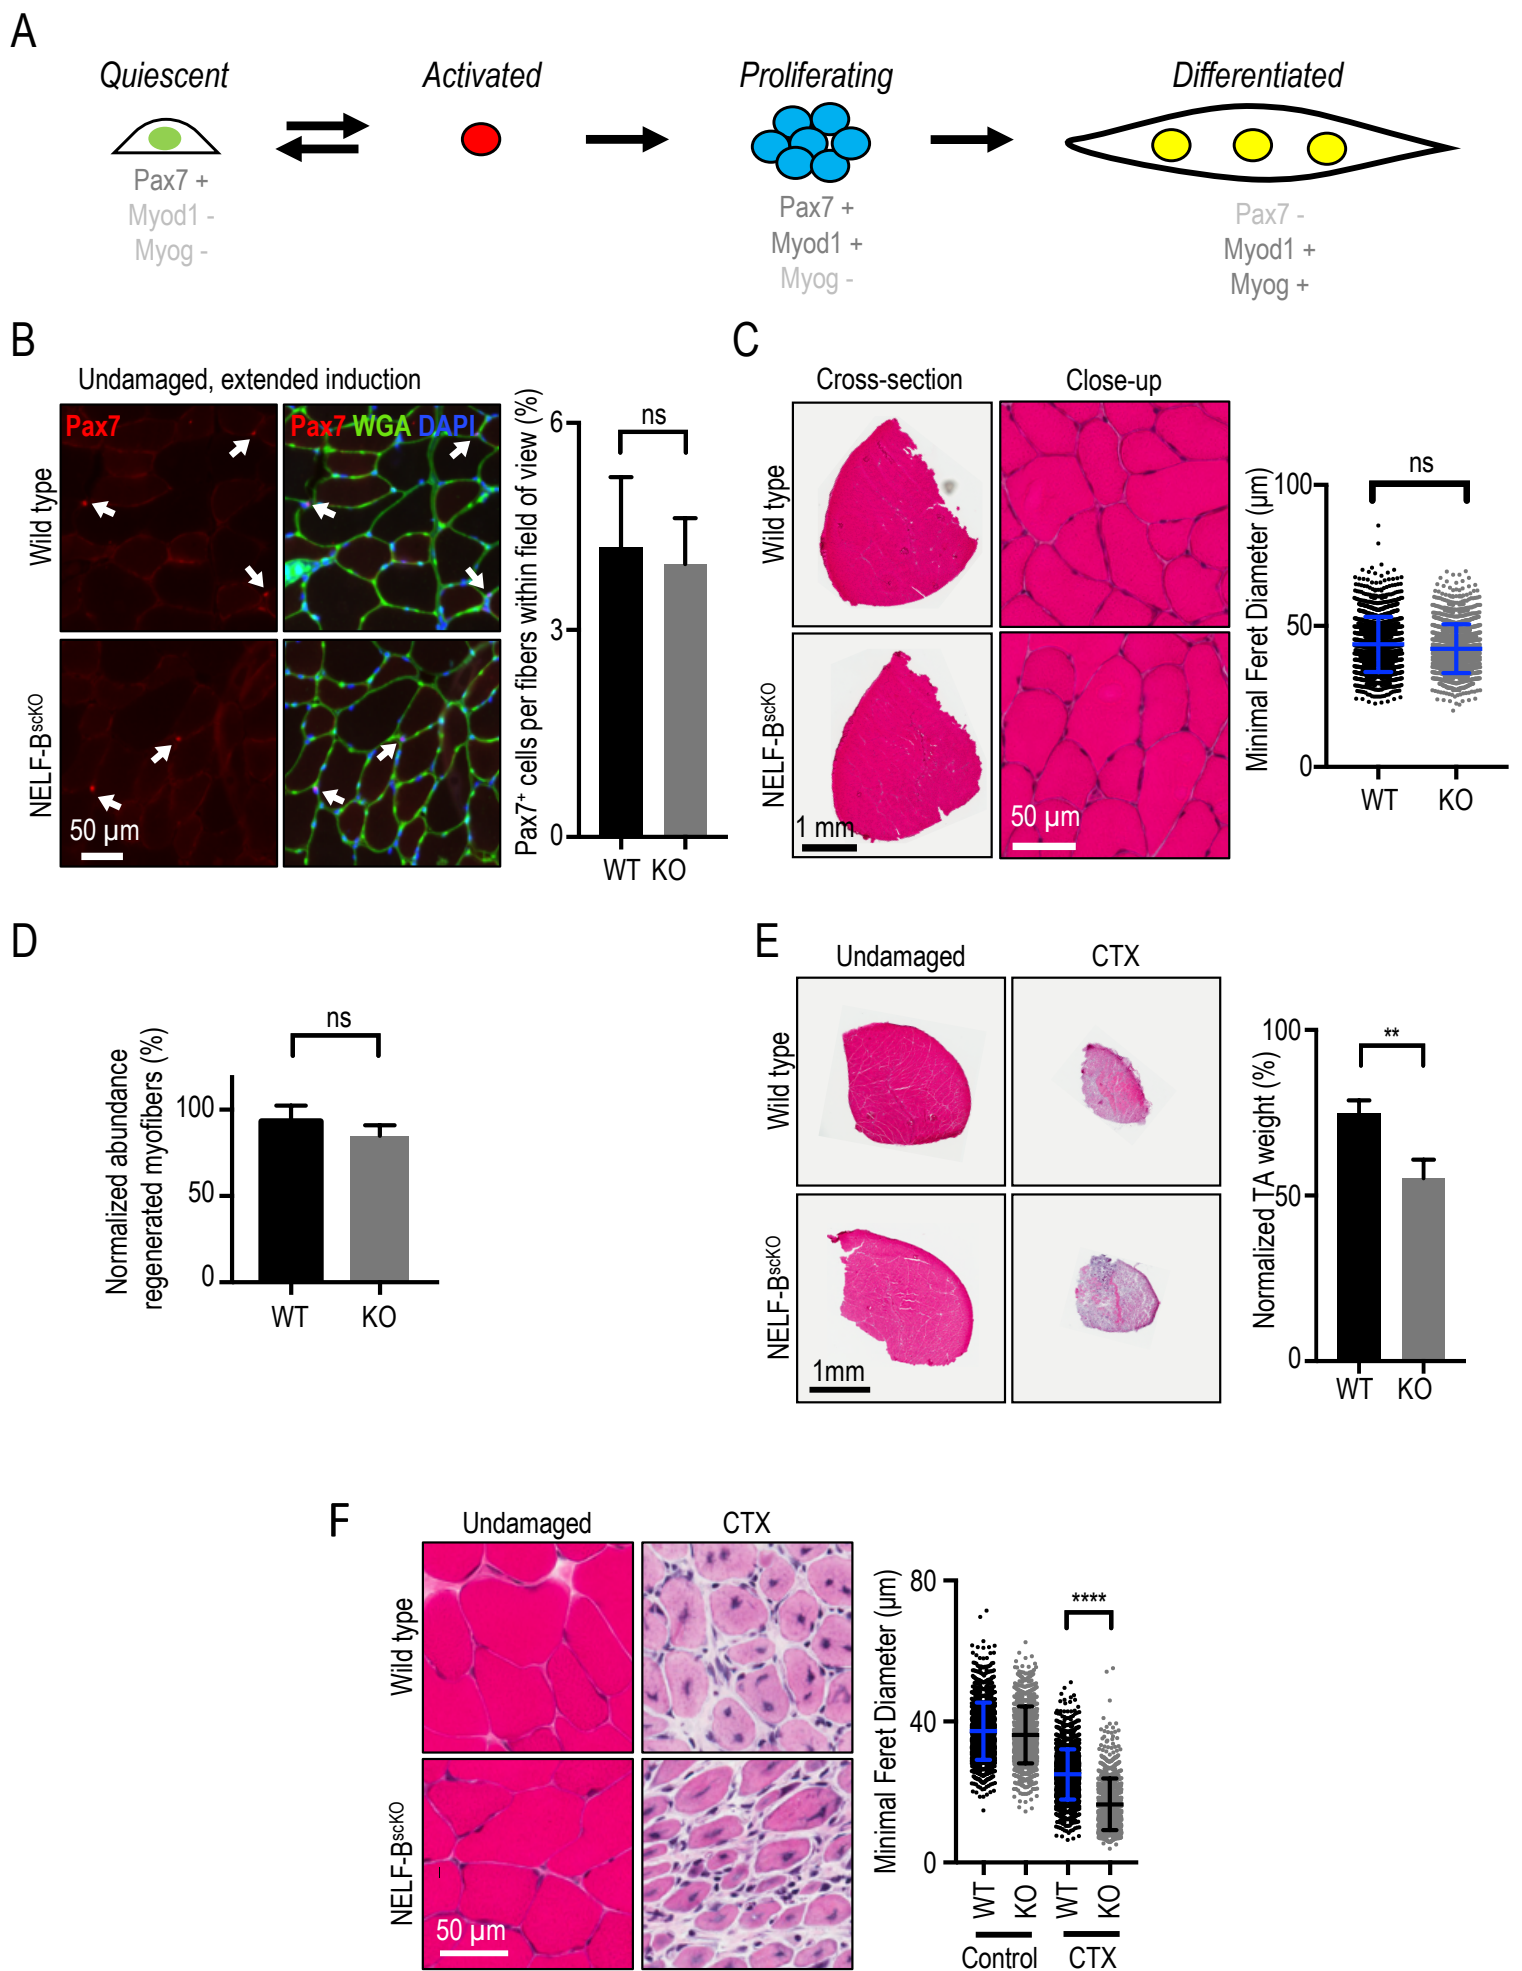

**Figure S1 (Related to Figure 1). Loss of NELF results in decreased myofiber diameter but not myofiber numbers. A)** Schematic representation of muscle regeneration. Skeletal muscle regeneration requires MuSCs to transition through 4 different states, namely quiescent MuSCs (green), activated MuSCs (red), proliferating myoblasts (blue), and multinucleated differentiated myofibers (yellow). **B)** Immunofluorescent characterization of undamaged TA muscle following long-term tamoxifen induction (8-weeks) shows no significant difference in the abundance of Pax7<sup>+</sup> MuSCs normalized to the amount of fibers within a field of view in NELF-B<sup>scKO</sup> populations [3.96% ± 0.38, n=3] when compared to WT controls [4.20% ± 0.59, n=3]. **C)** Hematoxylin & Eosin staining on undamaged TA cross-sections from B) shows no change in TA morphology and myofiber minimal Feret's diameter in the NELF-B<sup>scKO</sup> [43.48 μm ± 0.27, n=3] compared to WT controls [41.92 μm ± 0.24, n=3]. **D)** Normalized amounts of newly regenerated myofibers to the undamaged contralateral leg at 28-days post injury reveal no difference in regenerated myofiber abundance in the NELF-B<sup>scKO</sup> population [84.89% ± 3.55, n=3] compared to WT controls [93.17% ± 5.29, n=3]. **E)** Hematoxylin & Eosin staining of regenerated TA at 7-days post injury shows a reduced size of the regenerating TA muscle from NELF-B<sup>scKO</sup> compared to WT controls. The normalized regenerated weight to the undamaged contralateral leg is significantly reduced in the NELF-B<sup>scKO</sup> [55.24% ± 2.79, n=4] compared to WT controls [74.75% ± 2.33, n=3]. **F)** Magnified images from (D) show a reduced minimal Feret's myofiber diameter in the NELF-B<sup>scKO</sup> population [16.54 μm ± 0.24, n=3] compared to WT controls [25.01 μm ± 0.18, n=3].

**A** FACS gating strategy from input to EdU<sup>+</sup> (R5) and EdU<sup>-</sup> (R7) myogenic (TdT<sup>+</sup>Al7<sup>+</sup>) population

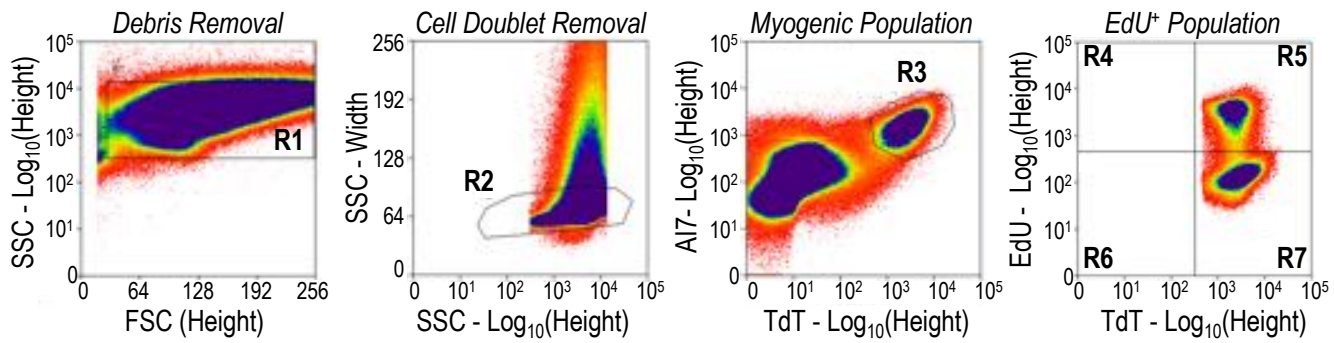

**B**

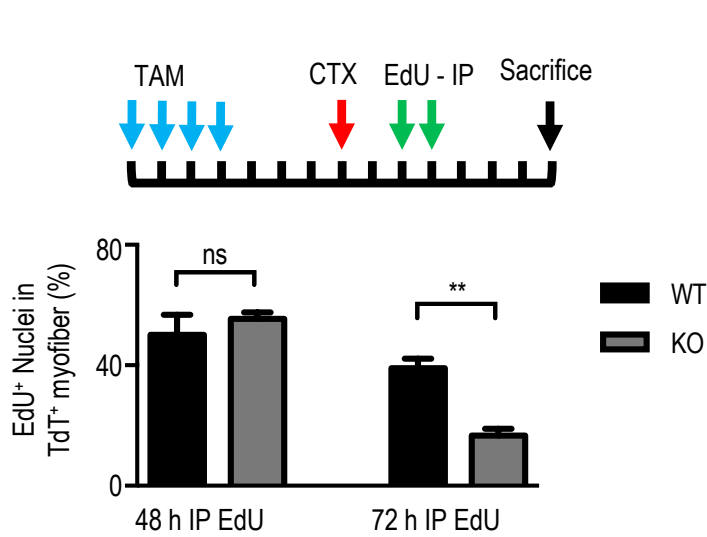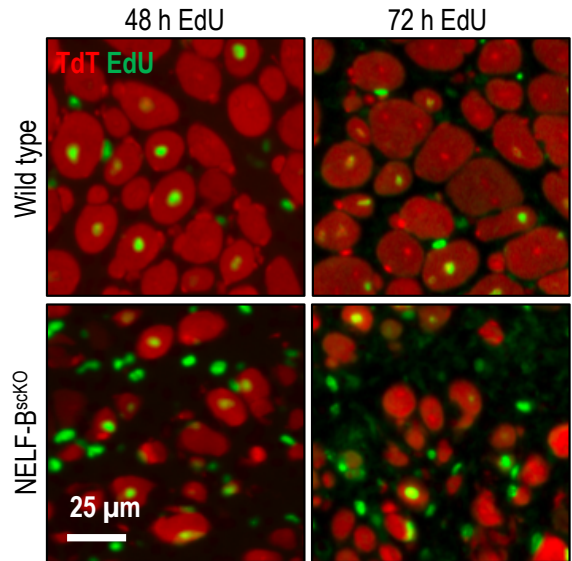

**C**

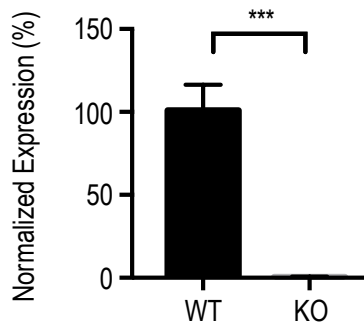

**D**

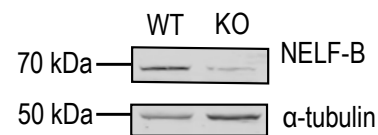

**F**

**E**

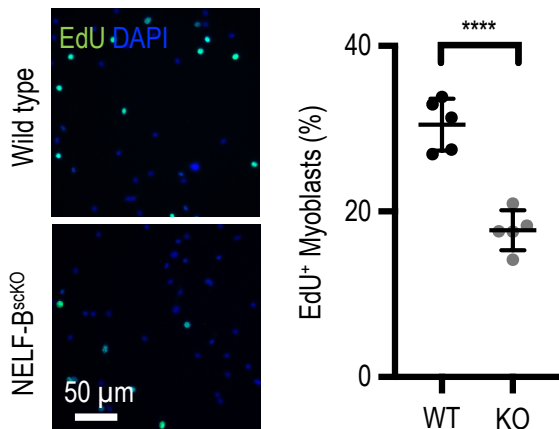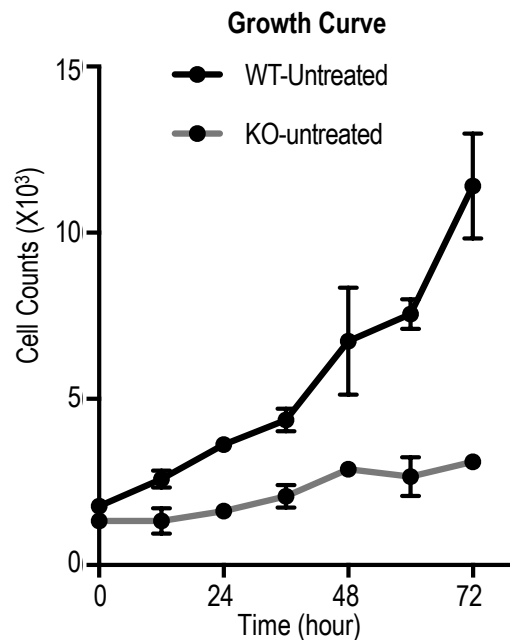

**Figure S2 (Related to Figure 2). Loss of NELF impairs proliferation of muscle progenitors.**

**A)** FACS gating strategy applied to quantify abundance of  $\text{EdU}^+$  MuSCs ( $\text{TdT}^+$   $\text{ITGA7}^+$ ) shown in Figure 2A and 2B. First, cell debris are excluded and only cells are selected (R1); from the cell population, doublets are removed (R2) to yield only single-cell populations, which are then selected for the MuSC specific population ( $\text{TdT}^+$   $\text{ITGA7}^+$ , R3), and finally for  $\text{EdU}^+$  populations (R5) and  $\text{EdU}^-$  populations (R7). **B)** *In vivo* EdU pulse-chase experiment administered to mice at 48-hours and 72-hour post-injury, followed with a 7-day regeneration period from time of injury. No significant difference is observed in the abundance of  $\text{EdU}^+$  centrally-located nuclei for EdU administered at 48-hours post-injury. When EdU is administered at 72-hours post-injury, a significantly reduced amount of  $\text{EdU}^+$  nuclei are observed in  $\text{NELF-B}^{\text{scKO}}$  [ $16.65\% \pm 2.33$ ,  $n=4$ ] mice compared to WT controls [ $39.01\% \pm 3.16$ ,  $n=3$ ]. **C)** RT-qPCR quantification of *Nelfb* transcripts isolated from  $\text{TdT}^+$  MuSCs shows that cells which are marked for recombination at the ROSA26 locus, also undergo recombination at the NELF-B locus. *Nelfb* expression levels were reduced upon tamoxifen treatment where  $\text{TdT}^+$  MuSCs from  $\text{NELF-B}^{\text{scKO}}$  ( $0.56\% \pm 0.11$ ,  $n=4$ ) were compared to  $\text{TdT}^+$  MuSCs from WT controls ( $100.90\% \pm 7.76$ ,  $n=4$ ). GAPDH used as an internal loading control. **D)** Western blot on whole cell extract from myoblasts induced *ex vivo* with 4-hydroxytamoxifen (4-OHT) for  $\text{NELF-B}^{\text{scKO}}$  (68kDa) and  $\alpha$ -tubulin (50 kDa) loading control. **E)** Analysis of cell cycle progression in *ex vivo* induced myoblasts shows reduced abundance of  $\text{EdU}^+$  myoblasts in  $\text{NELF-B}^{\text{scKO}}$  myoblasts [ $17.72\% \pm 1.08$ ,  $n=5$ ] compared to WT controls [ $30.50\% \pm 1.40$ ,  $n=5$ ]. **F)** Myoblasts from  $\text{NELF-B}^{\text{scKO}}$  and WT mice were induced with 4-OHT, then population expansion monitored at 12-hour intervals for 72 hours to monitor growth curve.



**A**

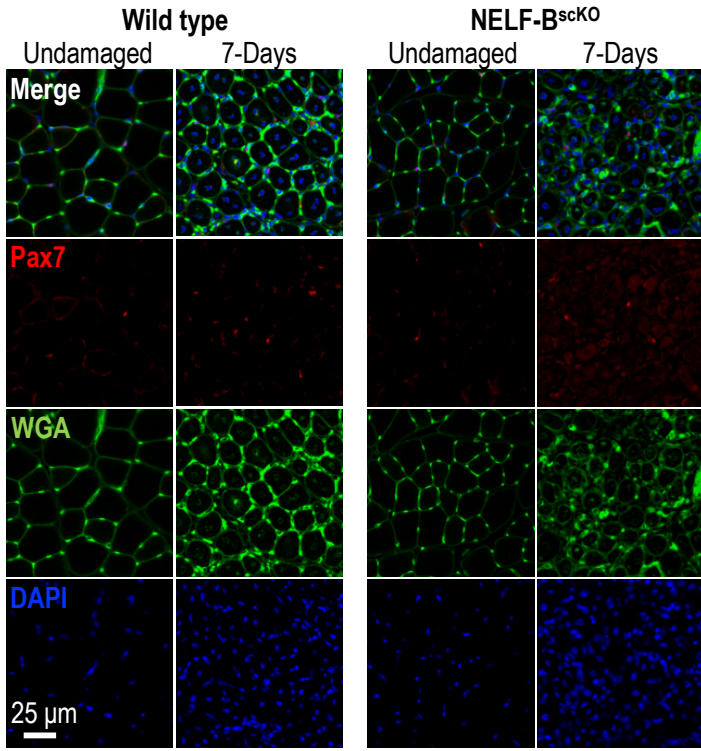

**B**

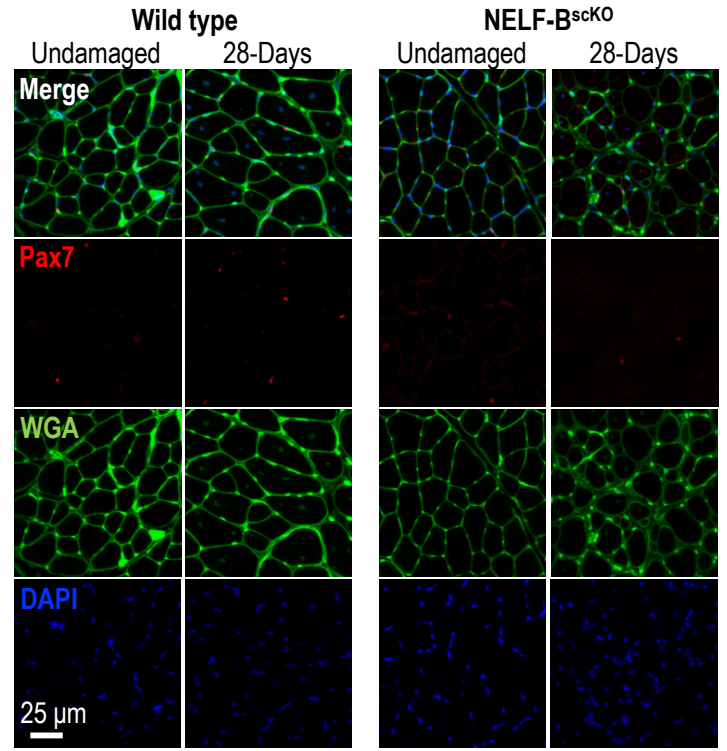

**C**

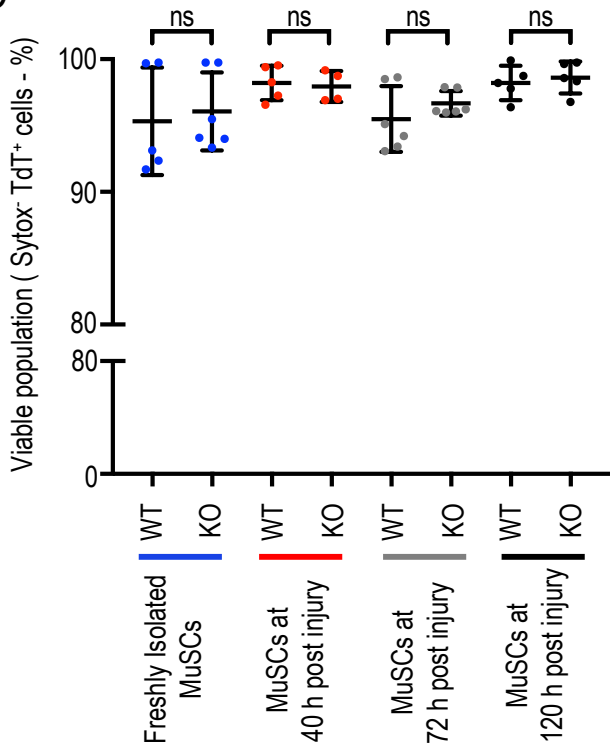

**D**

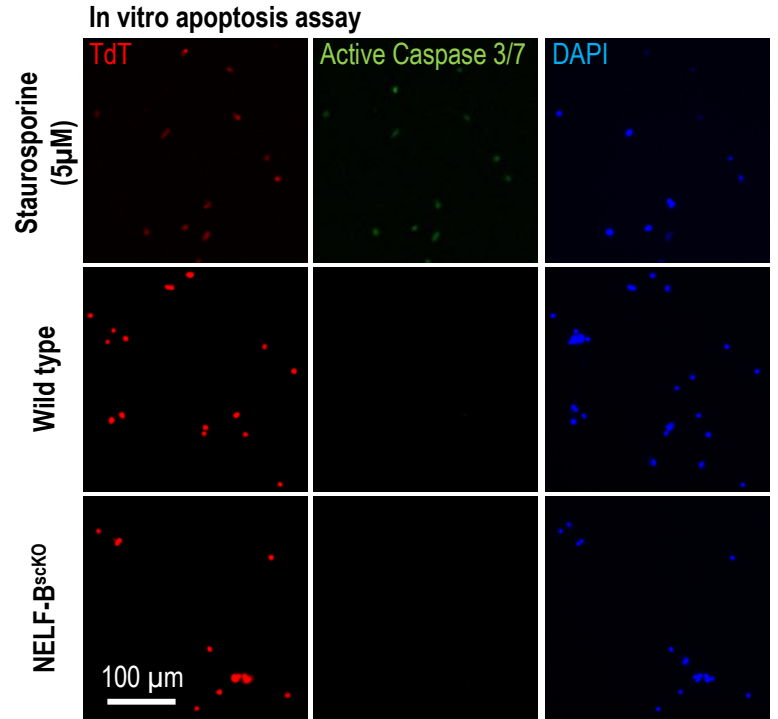

**Figure S3 (Related to Figure 3). MuSC pool in contralateral leg not affected in NELF- B<sup>scKO</sup> mice.** WT and NELF-B<sup>scKO</sup> mice were injured using CTX and allowed to regenerate for **A)** 7d or **B)** 28d. Immunofluorescence analysis of the damaged TA muscle alongside of the contralateral TA from the same mouse allows the identification of MuSCs (Pax7), glycosylated proteins (WGA), and all nuclei (DAPI). **C)** Analysis of viable (Sytox<sup>-</sup>) muscle progenitor cells (TdT<sup>+</sup> ITGA7<sup>+</sup>) from all experiments performed did not show significant differences in viable cell populations between NELF-B<sup>scKO</sup> and WT muscle progenitors. Samples included viability sorting for freshly isolated MuSCs (WT : 95.32% ± 1.81, n=5; NELF-B<sup>scKO</sup> : 96.06 ± 1.2, n=6), MuSCs from skeletal muscle at 40h post-injury (WT : 98.21% ± 0.58, n=5; NELF-B<sup>scKO</sup> : 97.96% ± 0.58, n=4), MuSCs from skeletal muscle at 72h post-injury (WT : 95.50% ± 1.02, n=6; NELF-B<sup>scKO</sup> : 96.68 ± 0.379, n=6), and myogenic progenitors from skeletal muscle at 120h post-injury (WT : 98.21% ± 0.58, n=5; NELF-B<sup>scKO</sup> : 98.61 ± 0.538, n=5). **D)** Live caspase screening apoptosis assay was performed on NELF-B<sup>scKO</sup> and WT myoblasts to test whether NELF-B<sup>scKO</sup> affected myoblast viability. No caspase<sup>+</sup> cells were identified in either NELF-B<sup>scKO</sup> or WT conditions. Positive control created by treating WT myoblasts with staurosporine (5 μM, 4 hours), showing functionality of the apoptosis screening kit.

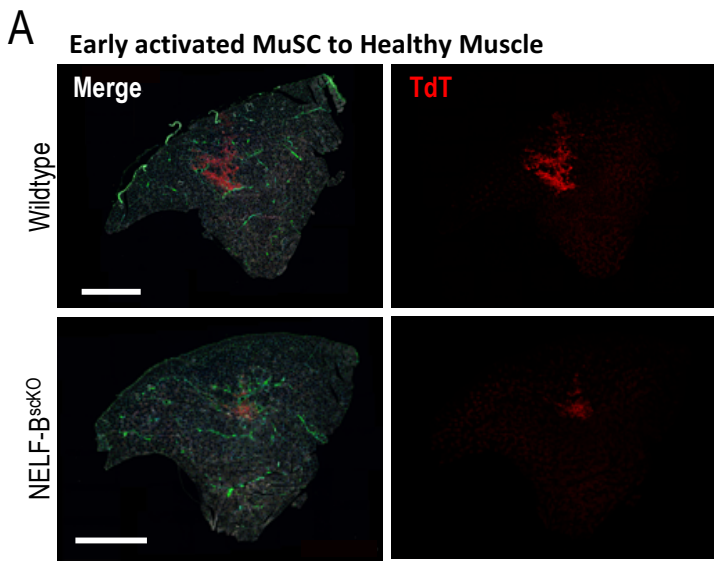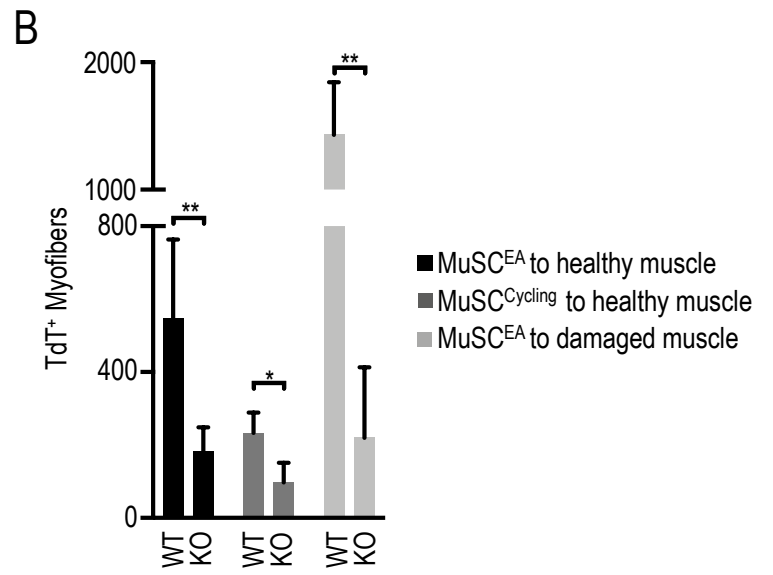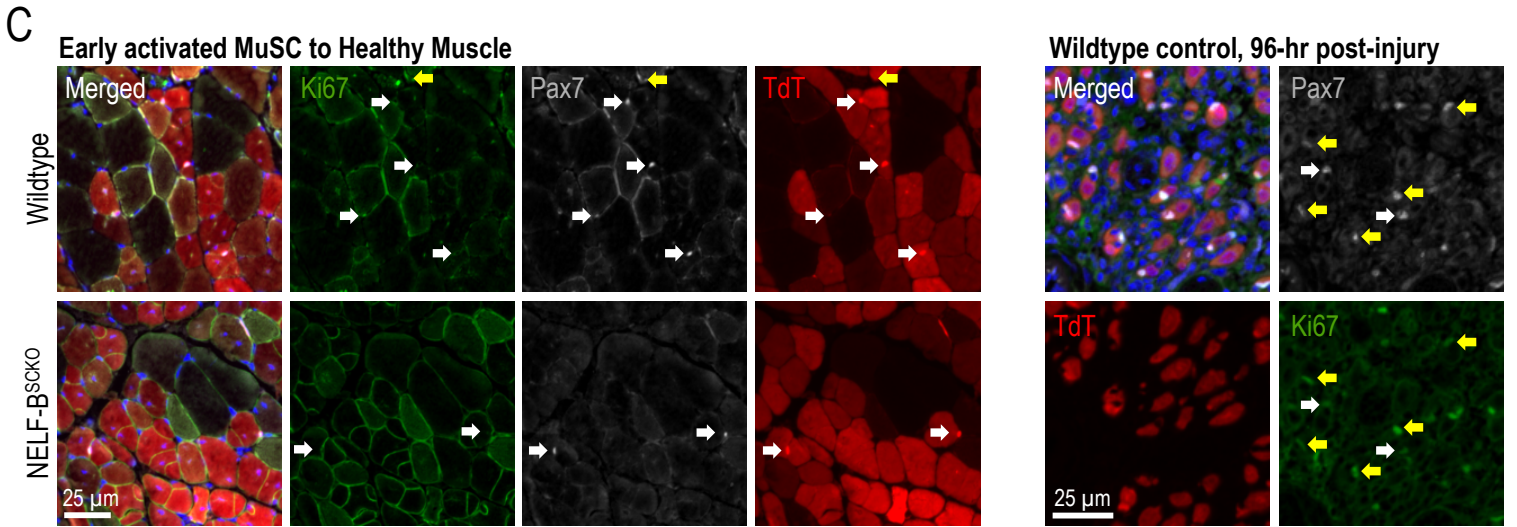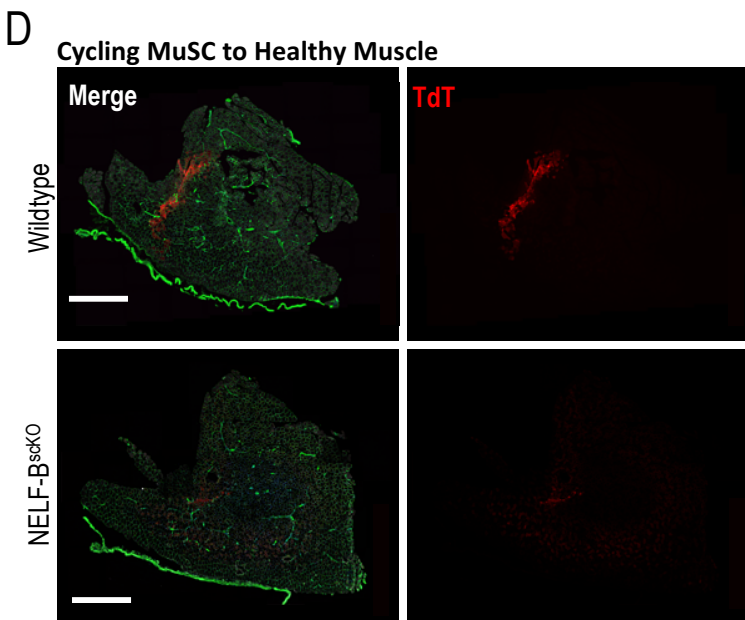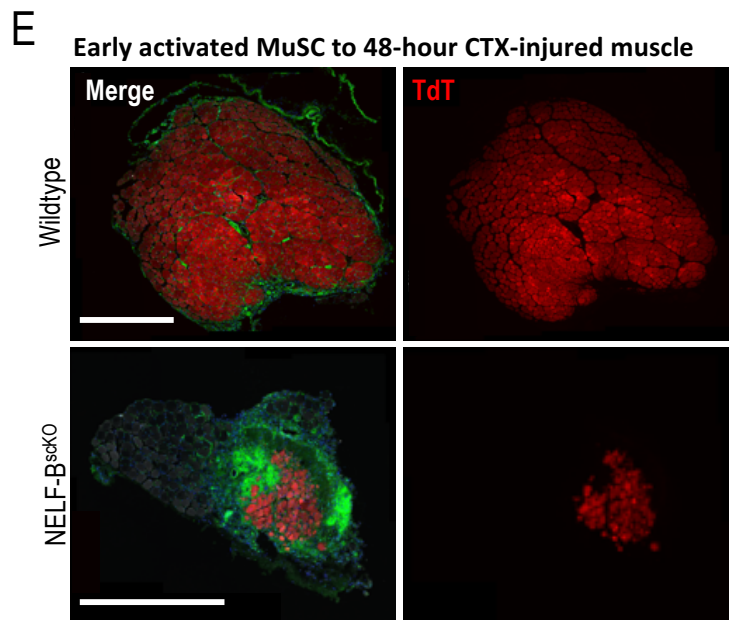

**Figure S4 (Related to Figure 4). Transplantation of MuSCs from NELF-B<sup>scKO</sup> mice show reduced incorporation into myofibers.** Immunofluorescence characterization on 10  $\mu\text{m}$  cross-sections from allograft recipient mice 21-days after transplantation. In all instances, 12,000 MuSCs from NELF-B<sup>scKO</sup> or WT were transplanted into irradiated NSG recipient mice. **(A)** Freshly isolated MuSCs from healthy muscle of WT and NELF-B<sup>scKO</sup> donors into uninjured irradiated recipient NSG muscle. **(B)** Abundance of TdT<sup>+</sup> myofibers for : transplants of freshly isolated MuSCs into healthy uninjured irradiated recipient muscle shows reduced TdT<sup>+</sup> myofibers upon a transplant of NELF-B<sup>scKO</sup> MuSCs ( $181.5 \pm 27.6$ , n=6) compared to WT ( $548.2 \pm 96.7$ , n=5); reduced amount of TdT<sup>+</sup> myofibers for transplant of activated MuSC from NELF-B<sup>scKO</sup> ( $97.33 \pm 31.39$ , n=3) compared to WT ( $233.2 \pm 25.1$ , n=5), and reduced TdT<sup>+</sup> myofibers for transplants of freshly isolated MuSCs into regenerating skeletal muscle at 48-hours post-injury for NELF-B<sup>scKO</sup> ( $220.0 \pm 96.7$ , n=4) compared to WT ( $1431 \pm 207$ , n=4) counterparts. **(C)** Representative images for Ki67 and Pax7 co-stain of transplanted freshly isolated MuSCs from NELF-B<sup>scKO</sup> and WT mice into healthy uninjured recipient NSG muscle, with positive control performed on WT muscle collected at 96-hours post-injury. **(D)** Transplant of 12,000 activated MuSCs isolated from regenerating muscle of WT and NELF-B<sup>scKO</sup> donors (40h after CTX injection) into uninjured irradiated recipient NSG muscle; and **(E)** transplant of freshly isolated MuSCs from healthy muscle of WT and NELF-B<sup>scKO</sup> donors into irradiated recipient muscle at 48 hours after CTX damage. All scale bars depict 500  $\mu\text{m}$ .

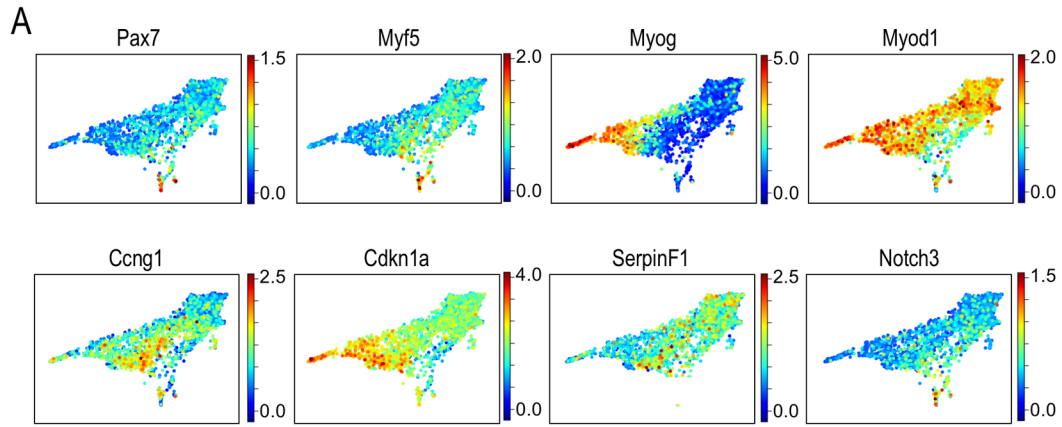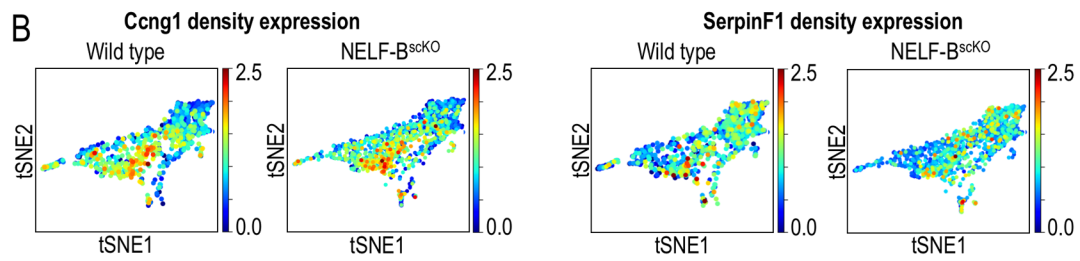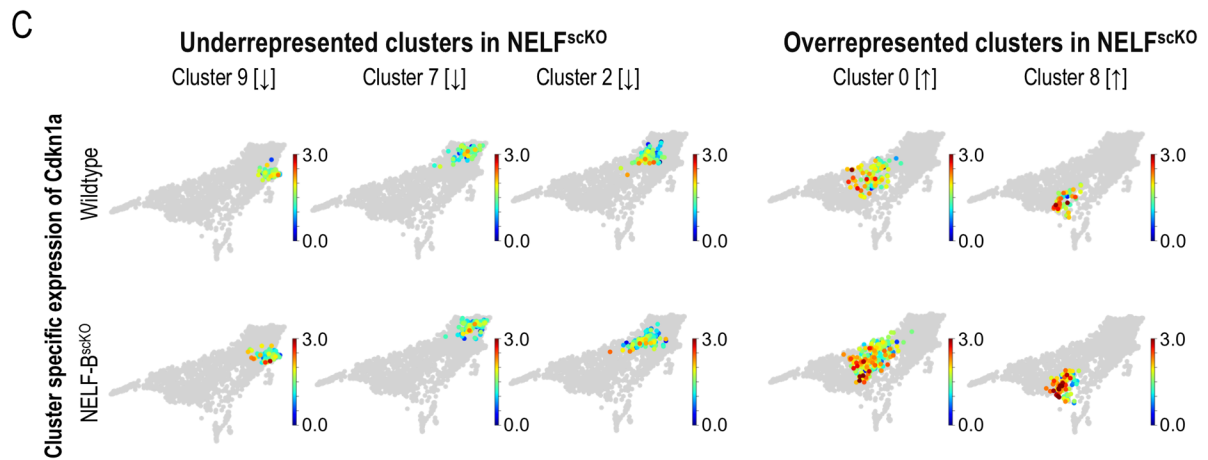

**Figure S5 (related to Figure 5). Single-cell characterization of myogenic progenitors in skeletal muscle regeneration.** **A)** Expression of specified myogenic regulatory factors and potential pathway-regulatory genes of interest overlaid on pseudotime PAGA trajectories (independently of genotype) . **B)** Expression of *Ccng1* and *SerpinF1* for WT and NELF-B<sup>sckO</sup> showing differential expression. **C)** Expression of *Cdkn1a* over PAGA trajectory for Louvain clusters 9, 7, 2, 0, and 8 showing differential expression of the cell cycle inhibitor marker through the differentially enriched clusters.

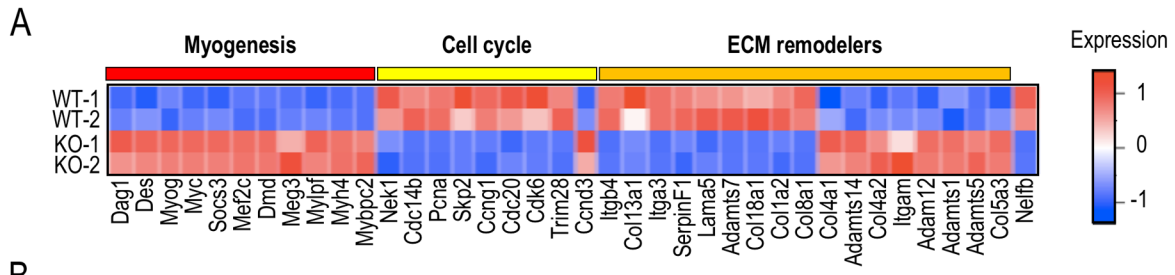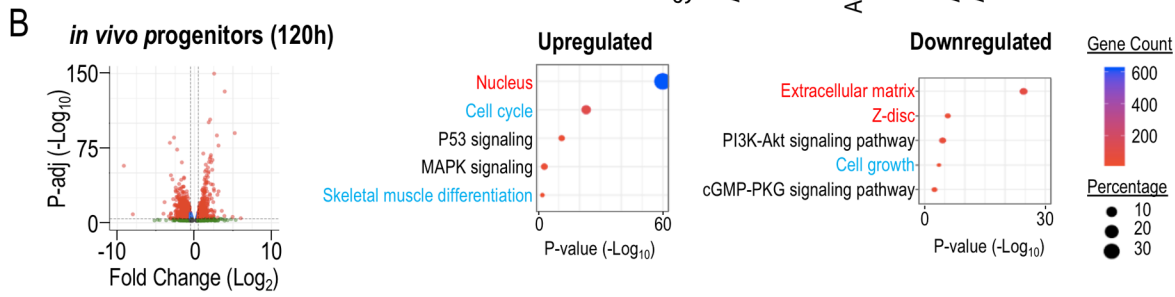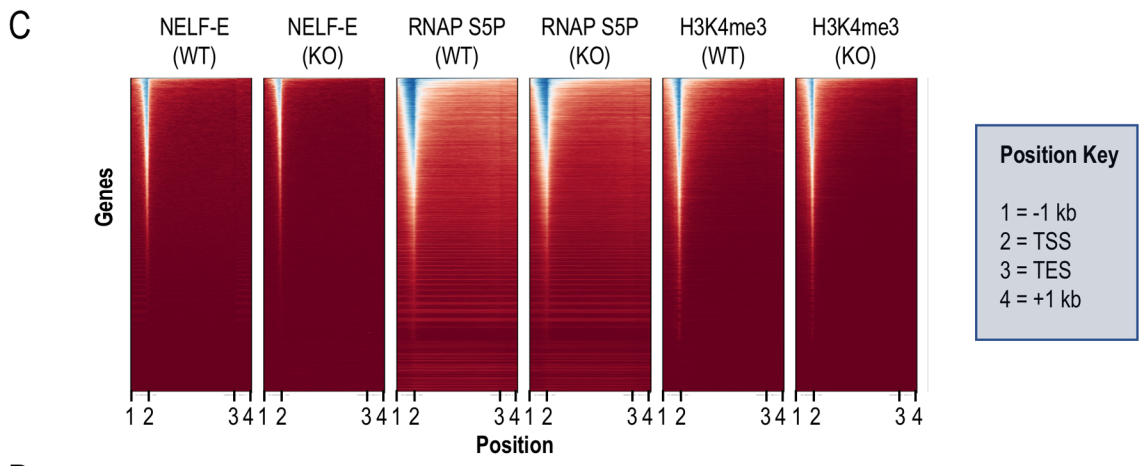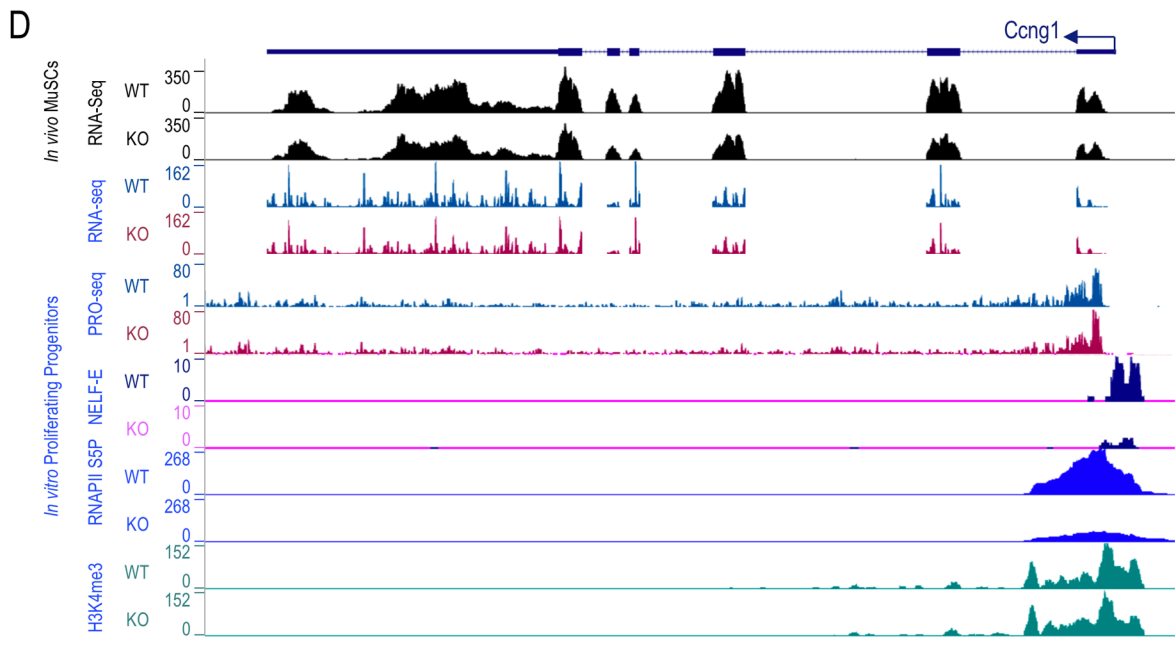



**Figure S6 (related to Figure 6). Transcriptome analysis of NELF-B<sup>scKO</sup> and WT populations.**

**A)** Heatmap showing differential gene expression of select terms relating to myogenesis, cell cycle regulation, and ECM remodeling events on RNA-seq from myogenic progenitors captured at 48-hours post-injury. **B)** RNA-seq was performed on myogenic progenitors (TdT<sup>+</sup> ITGA7<sup>+</sup>) isolated from regenerating skeletal muscle at 120h post-injury, represented as a volcano plot. Gene ontology analysis performed on upregulated and downregulated terms is shown as a dotplot as a function of Log<sub>10</sub>(p-value), amount of contributing terms to each GO term (dot color), and percentage of differentially expressed genes contributing to the term (dot size). **C)** Cut & Tag experiments performed for NELF-E, RNA Pol II (S5P), and H3K4me3, showing global occupancy on WT and NELF-B<sup>scKO</sup> samples. *Note that tamoxifen treatment results in ~90% deletion of NELF-B in MuSCs.* **D)** Representative UCSC track for *Ccng1* shows reduced *Ccng1* expression for NELF-B<sup>scKO</sup> samples compared to WT counterparts for RNA derived from MuSCs at 48h post-injury and from RNA-seq obtained from cultured myoblasts. PRO-seq analysis shows no effect on nascent transcript, while Cut & Tag experiments show reduced NELF-E and RNA Pol II (S5P) binding at the promoter region in NELF-B<sup>scKO</sup> samples compared to WT counterparts.

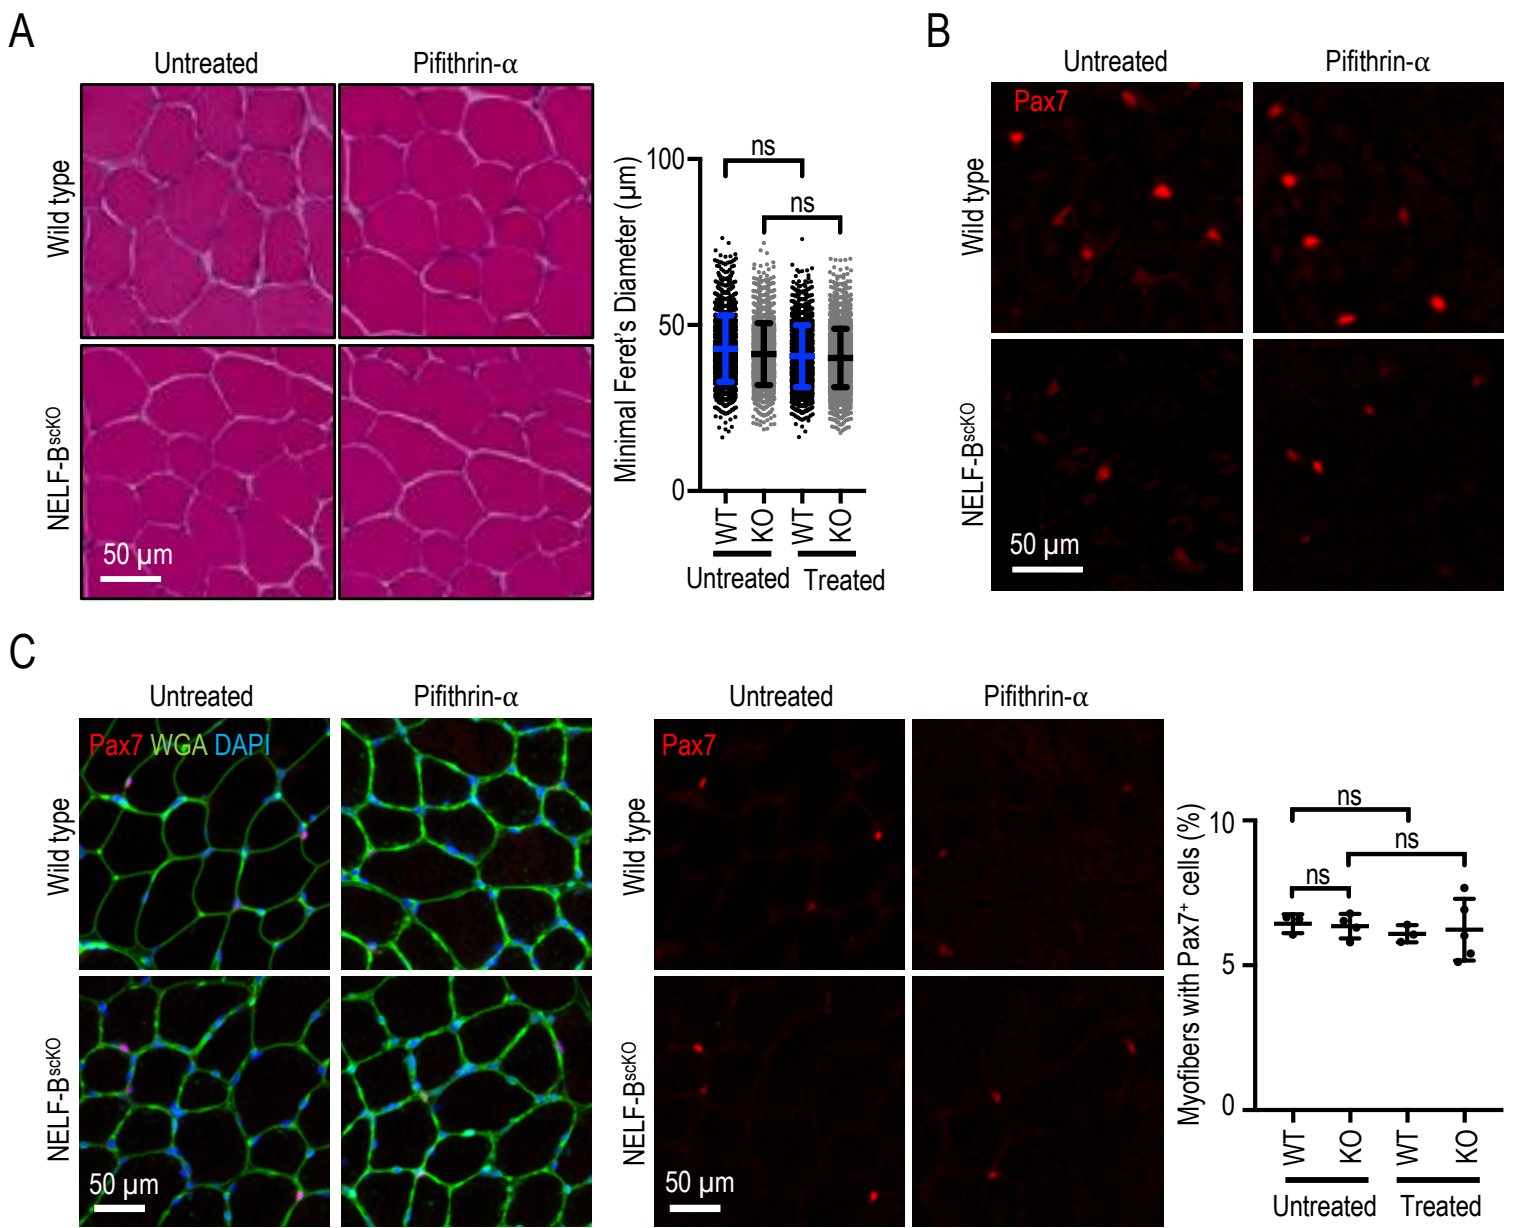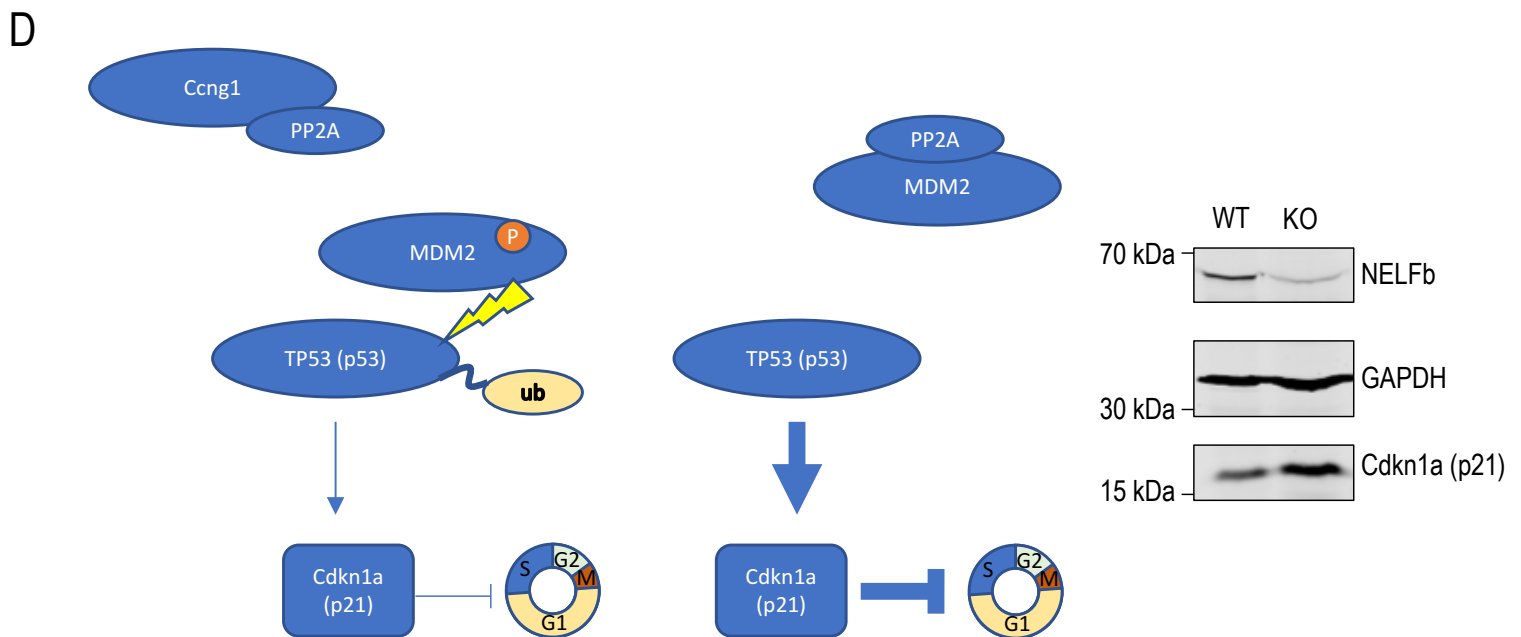

**Figure S7 (related to Figure 7).** **A)** Measurements of myofiber minimal Feret's diameter from undamaged contralateral leg for WT and NELF-B<sup>scKO</sup> samples in treated (pifithrin- $\alpha$ ) and untreated conditions shows no significant difference in myofiber minimal Feret's diameter. **B)** Pax7 only field from immunofluorescent characterized regenerated TA muscle shown in Figure 7D. **C)** Immunofluorescent characterization of undamaged contralateral legs for WT and NELF-B<sup>scKO</sup> 7 days after CTX damage in treated (pifithrin- $\alpha$ ) and untreated conditions. Abundance of Pax7<sup>+</sup> cells normalized to the amount of myofibers within a field of view shows no significant difference in Pax7<sup>+</sup> populations for untreated NELF-B<sup>scKO</sup> ( $6.353 \pm 0.213$ , n=4) to untreated WT ( $6.435 \pm 0.191$ , n=3), no significant difference between Pax7<sup>+</sup> cell abundance for WT-treated ( $6.087 \pm 0.173$ , n=3) and WT-untreated ( $6.435 \pm 0.1905$ , n=3), and no significant difference for Pax7<sup>+</sup> abundance for NELF-B<sup>scKO</sup> treated ( $6.225 \pm 0.476$ , n=5) and NELF-B<sup>scKO</sup> untreated ( $6.353 \pm 0.213$ , n=4). **D)** Diagrammatic representation of regulatory pathway from Cyclin G1 to p53 regulation and effect on cell cycle. Western blot shows loss of NELF-b results in upregulation of the p53 target protein Cdkn1a (p21) in proliferating cultured myoblasts.
